# Supplementary material for: Plant TDP1 (Tyrosyl-DNA Phosphodiesterase 1): A Phylogenetic Perspective and Gene Expression Data Mining
Source: Genes (Basel). 2020 Dec 7;11(12):1465. doi: 10.3390/genes11121465 (PMC7762302; doi:10.3390/genes11121465)
Supplement: Supplementary file 1 [file genes-11-01465-s001.zip › Figure_S1.pdf]

### HKD motif I

## HKD motif II

*Logo*

|                              |     |                                   |     |     |                                              |                      |                              |     |
|------------------------------|-----|-----------------------------------|-----|-----|----------------------------------------------|----------------------|------------------------------|-----|
| S. cerevisiae                | 181 | HHTKLLINFYDNGECKIFLPSNNFTSMETNLP  | 212 | 432 | HSKFLYMHGAT                                  | .....NSTGPCDASQVFKEI | .....ENCLYTSANLSQTAWGTYSRK.  | 477 |
| D. rerio                     | 269 | HHTKMLLWYEEGRVVIILTSNLIHADWYQK    | 299 | 501 | HIKTYMRISP                                   | .....DFTOL           | AWFLVTSANLSKAAWGALQKNN       | 537 |
| H. sapiens                   | 262 | HHTKMLLLYEEGERVVIH.TSNLIHADWYQK   | 292 | 493 | HIKTYMRPSP                                   | .....DFSKI           | AWFLVTSANLSKAAWGALQKNG       | 529 |
| H. glaber                    | 262 | HHTKMLLLYEEGERVVIH.TSNLIHADWYQK   | 292 | 493 | HIKTYMRISP                                   | .....NSSRI           | AWFLVTSANLSKAAWGALQKNG       | 529 |
| X. tropicalis                | 250 | HHTKMLLLYTEGERVVIH.TSNLIHADWYQK   | 280 | 482 | HIKTYMRISP                                   | .....DSQHL           | AWFLVTSANLSKAAWGALQKNG       | 518 |
| C. brachyrhynchos            | 258 | HHTKMLLLYEEGERVVIH.TSNLIAEDWYQK   | 288 | 490 | HIKTYMRISP                                   | .....DFQKI           | AWFLVTSANLSKAAWGALQKNG       | 526 |
| C. picta bellii              | 260 | HHTKMLLLYEEGERVVIH.TSNLIADADQK    | 290 | 492 | HIKTYMRPSP                                   | .....DFQKI           | AWFLVTSANLSKAAWGALQKNG       | 528 |
| C. papaya                    | 268 | HHSKAMLLVYPRGTRVIVH.TANLIYVDWNNK  | 298 | 469 | HIKTFTRYSG                                   | .....QKL             | AWFLVTSANLSKAAWGALQKNN       | 503 |
| A. chinensis var. chinensis  | 282 | HHSKAMLLVYPRGVRVIVH.TANLIYVDWNNK  | 312 | 512 | HIKTYTRYNG                                   | .....QNL             | AWLLLTSSNLSKAAWGALQKNN       | 546 |
| A. annua                     | 390 | HHSKAMFLVYPPQGVRIVH.TANLIYVDWNNK  | 420 | 620 | HIKTFTRYNG                                   | .....QNL             | AWFLLTSSNLSKAAWGALQKNN       | 654 |
| H. annuus                    | 278 | HHSKAMFLVYPPQGVRIVH.TANLIYVDWNNK  | 308 | 507 | HIKTFTRYNG                                   | .....QNL             | AWFLLTSSNLSKAAWGALQKNN       | 541 |
| L. sativa                    | 281 | HHSKAMFLVYPPQGVRIVH.TANLIYVDWNNK  | 311 | 512 | HIKTFTRYNG                                   | .....QNL             | AWFLLTSSNLSKAAWGALQKNN       | 546 |
| C. cardunculus var. scolymus | 279 | HHSKAMFLVYPPQGVRIVH.TANLIYVDWNNK  | 309 | 509 | HIKTFTRYNG                                   | .....QNL             | AWFLLTSSNLSKAAWGALQKNN       | 543 |
| C. arabica                   | 284 | HHSKAMLLVYPPQGVRVVH.TANLIHVDWNNK  | 314 | 514 | HIKTFTRYNG                                   | .....QNL             | AWFLLTSSNLSKAAWGALQKNG       | 548 |
| C. eugenioides               | 284 | HHSKAMLLVYPPQGVRVVH.TANLIHVDWNNK  | 314 | 514 | HIKTFTRYNG                                   | .....QNL             | AWFLLTSSNLSKAAWGALQKNG       | 548 |
| N. attenuata                 | 281 | HHSKAMLLVYPTGVRVIVH.TANLIYVDWNNK  | 311 | 511 | HIKTFTRYNG                                   | .....QSL             | AWLLLTSSNLSKAAWGALQKNN       | 545 |
| S. tuberosum                 | 279 | HHSKAMLLVYPTGVRVIVH.TANLISIDWNNK  | 309 | 509 | HIKTFTRYNG                                   | .....QSL             | AWFLLTSSNLSKAAWGALQKNN       | 543 |
| S. lycopersicum              | 278 | HHSKAMLLVYPTGVRVIVH.TANLISIDWNNK  | 308 | 508 | HIKTFTRYNG                                   | .....QSL             | AWFLLTSSNLSKAAWGALQKNN       | 542 |
| S. pennellii                 | 303 | HHSKAMLLVYPTGVRVIVH.TANLISIDWNNK  | 333 | 533 | HIKTFTRYNG                                   | .....QSL             | AWFLLTSSNLSKAAWGALQKNN       | 567 |
| B. rapa                      | 240 | HHSKAMFLVYPRGVRVVH.TANLIHVDWNNK   | 270 | 473 | HIKTFTRYSD                                   | .....QKI             | AWFLLTSSNLSKAAWGALQKNN       | 507 |
| B. napus                     | 241 | HHSKAMFLVYPRGVRVVH.TANLIHVDWNNK   | 271 | 473 | HIKTFTRYSD                                   | .....QKI             | AWFLLTSSNLSKAAWGALQKNN       | 507 |
| C. rubella                   | 306 | HHSKAMFLVYPRGVRVVH.TANLIHVDWNNK   | 336 | 537 | HIKTFTRYSD                                   | .....QKL             | AWFLLTSSNLSKAAWGALQKNN       | 571 |
| E. salsugineum               | 252 | HHSKAMFLVYPRGVRVVH.TANLIHVDWNNK   | 282 | 484 | HIKTFTRYSD                                   | .....QKL             | AWFLLTSSNLSKAAWGALQKNN       | 518 |
| A. thaliana                  | 235 | HHSKAMFLVYPRGVRVVH.TANLIHVDWNNK   | 265 | 466 | HIKTFTRYND                                   | .....QKI             | AWFLLTSSNLSKAAWGALQKNN       | 500 |
| A. lyrata subsp. lyrata      | 242 | HHSKAMFLVYPRGVRVVH.TANLIHVDWNNK   | 272 | 473 | HIKTFTRYND                                   | .....QKL             | AWFLLTSSNLSKAAWGALQKNN       | 507 |
| G. arboreum                  | 273 | HHSKAMLLVYPPQGVRVIVH.TANLIYVDWNNK | 303 | 503 | HIKTYTRYKG                                   | .....QNL             | AWFLLTSSNLSKAAWGALQKNN       | 537 |
| G. raimondii                 | 273 | HHSKAMLLVYPPQGVRVIVH.TANLIYVDWNNK | 303 | 503 | HIKTYTRYKG                                   | .....QNL             | AWFLLTSSNLSKAAWGALQKNN       | 537 |
| D. zibethinus                | 266 | HHSKAMLLVYPPQGVRVIVH.TANLIYVDWNNK | 296 | 496 | HIKTYTRYKG                                   | .....QKL             | AWFLLTSSNLSKAAWGALQKNN       | 530 |
| T. cacao                     | 273 | HHSKAMLLVYPPQGVRVIVH.TANLIYVDWNNK | 303 | 503 | HIKTYTRYKG                                   | .....QKL             | AWFLLTSSNLSKAAWGALQKNN       | 537 |
| H. umbratica                 | 273 | HHSKAMLLVYPPQGVRVIVH.TANLIYVDWNNK | 303 | 503 | HIKTYTRYKG                                   | .....QKL             | AWFLLTSSNLSKAAWGALQKNN       | 537 |
| P. trichocarpa               | 268 | HHSKAMFLVYPRGVRVIVH.TANLIYVDWNNK  | 298 | 498 | HIKTFTRYNG                                   | .....QKL             | AWFLLTSSNLSKAAWGALQKNN       | 532 |
| R. communis                  | 271 | HHSKAMLLVYPRGVRIVH.TANLIYVDWNNK   | 301 | 501 | HIKTFTRYNG                                   | .....QKL             | AWLLLTSSNLSKAAWGALQKNN       | 535 |
| J. curcas                    | 278 | HHSKAMLLVYPRGVRIVH.TANLIYVDWNNK   | 308 | 508 | HIKTFTRYNG                                   | .....QKL             | AWFLLTSSNLSKAAWGALQKNN       | 542 |
| M. esculenta                 | 279 | HHSKAMFLVYPRGVRIVH.TANLIYVDWNNK   | 309 | 510 | HIKTFTRYSG                                   | .....QKL             | AWFLLTSSNLSKAAWGALQKNN       | 544 |
| H. brasiliensis              | 279 | HHSKAMLLVYPRGVRIVH.TANLIYVDWNNK   | 309 | 509 | HIKTFTRYNG                                   | .....QKL             | AWFLLTSSNLSKAAWGALQKNN       | 543 |
| S. oleracea                  | 293 | HHSKAMLLVYPRGVRVIVH.TANLINVDWNNK  | 323 | 523 | HIKTFVRYNG                                   | .....QNI             | AWFLLTSSNLSKAAWGALQKNN       | 557 |
| E. grandis                   | 269 | HHSKAMLLVYPTGVRVIVH.TANLINVDWNNK  | 299 | 499 | HIKTYTRYKG                                   | .....QKL             | AWFLLTSSNLSKAAWGALQKNG       | 533 |
| M. truncatula                | 261 | HHSKAMFLVYPRGVRVIVH.TANLIYVDWNNK  | 291 | 491 | HIKTFARYNN                                   | .....QNL             | AWFCLTSSNLSKAAWGALQKNN       | 525 |
| C. arietinum                 | 263 | HHSKAMFLVYPRGVRIVH.TANLIYVDWNNK   | 293 | 493 | HIKTFARYNN                                   | .....QNL             | AWFLLTSSNLSKAAWGALQKNN       | 527 |
| A. precatorius               | 273 | HHSKAMLLIYPPKGVRVIVH.TANLIYVDWNNK | 303 | 503 | HIKTFARYNN                                   | .....QNL             | AWFLLTSSNLSKAAWGALQKNN       | 537 |
| C. cajan                     | 241 | HHSKAMLLIYPPQGVRVIVH.TANLIYVDWNNK | 271 | 471 | HIKTFARYNN                                   | .....QNL             | AWFLLTSSNLSKAAWGALQKNN       | 505 |
| M. pruriens                  | 278 | HHSKAMLLIYPPQGVRVIVH.TANLIYVDWNNK | 308 | 508 | HIKTFARYNN                                   | .....QSL             | .....AKAAWGALQKNN            | 532 |
| V. radiata var. radiata      | 276 | HHSKAMLLIYPPQGVRVIVH.TANLIYVDWNNK | 306 | 506 | HIKTFARYNN                                   | .....QSL             | AWFLLTSSNLSKAAWGALQKNS       | 540 |
| G. soja                      | 273 | HHSKAMLLIYPPQGVRVIVH.TANLIYVDWNNK | 303 | 503 | HIKTFARYKN                                   | .....QSL             | AWFLLTSSNLSKAAWGALQKNN       | 537 |
| G. max                       | 273 | HHSKAMLLIYPPQGVRVIVH.TANLIYVDWNNK | 303 | 503 | HIKTFARYKN                                   | .....QSL             | AWFLLTSSNLSKAAWGALQKNN       | 537 |
| M. charantia                 | 279 | HHSKAMFLVYPRGTRMVVH.TANLIYVDWNNK  | 309 | 509 | HIKTFARYNG                                   | .....QKL             | AWLLVLTSSNLSKAAWGALQKNN      | 543 |
| C. sativus                   | 353 | HHSKAMFLVYPRGTRMVVH.TANLIYVDWNNK  | 383 | 583 | HIKTFARYNG                                   | .....QKL             | AWLLVLTSSNLSQAAGWALQKNN      | 617 |
| C. maxima                    | 274 | HHSKAMFLVYPRGTRMVVH.TANLIYVDWNNK  | 304 | 504 | HIKTFARYNG                                   | .....QKL             | AWLLVLTSSNLSKAAWGALQKNN      | 538 |
| C. moschata                  | 274 | HHSKAMFLVYPRGTRIVVH.TANLIYVDWNNK  | 304 | 504 | HIKTFARYNG                                   | .....QKL             | AWLLVLTSSNLSKAAWGALQKNN      | 538 |
| C. pepo subsp. pepo          | 274 | HHSKAMFLVYPRGTRIVVH.TANLIYVDWNNK  | 304 | 504 | HIKTFARYNG                                   | .....QKL             | AWLLVLTSSNLSKAAWGALQKNN      | 538 |
| Z. jujuba                    | 296 | HHSKAMLLVYPRGVRIVH.TANLIYVDWNNK   | 326 | 526 | HIKTFTRYNG                                   | .....QKL             | AWFLLTSSNLSKAAWGALQKNN       | 560 |
| M. notabilis                 | 288 | HHSKAMLLVYPRGVRIVH.TANLIYVDWNNK   | 318 | 518 | HIKTFARYND                                   | .....QKL             | AWFLLTSSNLSKAAWGALQKNN       | 552 |
| P. andersonii                | 283 | HHSKAMLLVYPPQGVRIVH.TANLIYVDWNNK  | 313 | 513 | HIKTFARYNG                                   | .....QKL             | AWFLLTSSNLSKAAWGALQKNN       | 547 |
| T. orientale                 | 283 | HHSKAMLLVYPPQGVRIVH.TANLIYVDWNNK  | 313 | 513 | HIKTFARYNG                                   | .....QKL             | AWFLLTSSNLSKAAWGALQKNN       | 547 |
| C. sinensis                  | 255 | HHSKAMLLVYPRGVRIVH.TANLIHVDWNNK   | 285 | 485 | HIKTFARYNG                                   | .....QKL             | AWFLLTSSNLSKAAWGALQKNN       | 519 |
| C. clementina                | 255 | HHSKAMLLVYPRGVRIVH.TANLIHVDWNNK   | 285 | 485 | .....N                                       | .....CEC             | SWFLLTSSNLSKAAWGALQKNN       | 510 |
| Q. suber                     | 276 | HHSKAMLLVYRRGVRIVH.TANLIYVDWNNK   | 306 | 506 | HIKTFTRYNG                                   | .....QKL             | AWLLLTSSNLSKAAWGALQKNN       | 540 |
| F. vesca subsp. vesca        | 271 | HHSKAMLLVYPRGVRVIVH.TANLIYVDWNNK  | 291 | 491 | HIKTFTRYNG                                   | .....QKL             | AWFLLTSSNLSKAAWGALQKNN       | 525 |
| R. chinensis                 | 264 | HHSKAMLLVYPRGVRIVH.TANLIYVDWNNK   | 304 | 504 | HIKTFTRYSG                                   | .....QKL             | AWFLLTSSNLSKAAWGALQKNN       | 538 |
| M. domestica                 | 241 | HHSKAMLLVYPRGVRIVH.TANLIHVDWNNK   | 271 | 471 | HIKTFARYNG                                   | .....QKL             | AWFLLTSSNLSKAAWGALQKNN       | 505 |
| P. persica                   | 294 | HHSKAMLLVYPRGVRIVH.TANLIYVDWNNK   | 324 | 524 | HIKTYTRYNG                                   | .....QKL             | AWFLLTSSNLSKAAWGALQKNN       | 558 |
| P. avium                     | 294 | HHSKAMLLVYPRGVRIVH.TANLIYVDWNNK   | 324 | 524 | HIKTYTRYNG                                   | .....QKL             | AWFLLTSSNLSKAAWGALQKNN       | 558 |
| P. patens                    | 343 | HHTKAMFLLYPTGTRIVH.TANLIYVDWNNK   | 373 | 574 | HIKTFTRYND                                   | .....QRL             | AWFLLTSSNLSKAAWGALQKNG       | 608 |
| S. moellendorffii            | 260 | HHSKAMLLVYPTGVRVVH.TANLINVDWNNK   | 290 | 490 | HIKTFVRFRE                                   | .....NAL             | AWVCLTSSNLSKAAWGALQKNG       | 524 |
| P. sylvestris                | 358 | HHSKAMLLVYSRGVRVVH.TANLIYVDWNNK   | 388 | 588 | HIKTYARYNG                                   | .....QEL             | AWFLLTSSNLSKAAWGALQKNS       | 622 |
| T. baccata                   | 307 | HHSKAMLLVYSRGVRVVH.TANLIYVDWNNK   | 337 | 537 | HIKTYARYNG                                   | .....QNL             | AWFLLTSSNLSKAAWGALQKNS       | 571 |
| D. oligosanthos              | 261 | HHSKAMLLVYPPQGVRVVH.SANMIHVDWNNK  | 291 | 491 | HIKTFTRYNG                                   | .....QDI             | SWFLLTSSNLSKAAWGALQKNN       | 525 |
| O. sativa Japonica Group     | 378 | HHSKAMLLVYPPQGVRVVH.TANLIHVDWNNK  | 408 | 608 | HIKTFTRYNG                                   | .....QDI             | AWFLLTSSNLSKAAWGALQKNN       | 642 |
| B. distachyon                | 301 | HHSKAMLLVYPPQGTRVVH.TANLIHVDWNNK  | 331 | 531 | HIKTFARYNG                                   | .....QNI             | AWFLLTSSNLSKAAWGALQKNN       | 565 |
| T. urartu                    | 299 | HHSKAMLLVYPPQGTRVVH.TANLIHVDWNNK  | 329 | 529 | HIKTFTRYNG                                   | .....QNI             | AWFLLTSSNLSKAAWGALQKNN       | 563 |
| A. tauschii subsp. tauschii  | 299 | HHSKAMLLVYPPQGTRVVH.TANLIHVDWNNK  | 329 | 529 | HIKTFTRYNG                                   | .....QNI             | AWFLLTSSNLSKAAWGALQKNN       | 563 |
| S. italica                   | 301 | HHSKAMLLVYPPQGTRIVH.TANLIHVDWNYK  | 331 | 531 | HIKTFTRYSG                                   | .....QNI             | AWFLLTSSNLSKAAWGALQKNN       | 565 |
| P. hallii                    | 301 | HHSKAMLLVYPPQGTRVVH.TANMIHVDWNNK  | 331 | 531 | HIKTFTRYNG                                   | .....QNI             | AWLLLTSSNLSKAAWGALQKNN       | 565 |
| Z. mays                      | 298 | HHSKAMLLVYPPQGTRIVH.TANLIHVDWNYK  | 328 | 528 | HIKTFTRYSG                                   | .....QNI             | AWFLLTSSNLSKAAWGALQKNN       | 562 |
| S. bicolor                   | 301 | HHSKAMLLVYPPQGTRIVH.TANLIHVDWNYK  | 331 | 531 | HIKTFTRYSG                                   | .....QNI             | AWFLLTSSNLSKAAWGALQKNN       | 565 |
| P. equestris                 | 306 | HHSKAMFLVYEKGVRIVH.SANLIYVDWNNK   | 336 | 536 | HIKSYTRHSA                                   | .....QNI             | AWFLLTSSNLSKAAWGALQKNN       | 570 |
| D. catenatum                 | 316 | HHSKAMLLVYETGVRIVH.SANLIHVDWNNK   | 346 | 546 | HIKSYTRHSG                                   | .....QNL             | AWFLLTSSNLSKAAWGALQKNN       | 580 |
| A. comosus                   | 270 | HHSKAMLLVYPPQGTRVVH.TANLIYVDWNNK  | 300 | 500 | .....FKQ                                     | .....GSL             | GCITEEQYATYDWTWVYFCRPNFTLNHI | 533 |
| A. shenzhenica               | 161 | HHSKAMLLIYQNGVRVIVH.TANLIHVDWNNK  | 191 | 391 | HIKSYTRHNG                                   | .....QKL             | AWFLLTSSNLSKAAWGALQKNN       | 425 |
| A. trichopoda                | 303 | HHSKAMLLVYPRGVRIVH.TANLIYVDWNNK   | 333 | 533 | HIKTYTRYNG                                   | .....QSL             | AWFLLTSSNLSKAAWGALQKNC       | 567 |
| V. vinifera                  | 276 | HHSKAMLLVYPRGVRVIVH.TANLIYVDWNNK  | 306 | 506 | HIKTYTRYNG                                   | .....QNL             | AWFLLTSSNLSKAAWGALQKNN       | 540 |
| M. cordata                   | 303 | HHSKAMFLVYPPQGTRVVIH.TANLIHVDWNNK | 333 | 533 | HIKTYTRYNG                                   | .....QNL             | AWFLLTSSNLSKAAWGALQKND       | 567 |
| A. officinalis               | 300 | HHSKAMLLVYATGVRVVH.TANLIYVDWNNK   | 330 | 530 | HIKTYTRYNG                                   | .....QNL             | AWFLLTSSNLSKAAWGALQKNN       | 564 |
| P. dactylifera               | 109 | HHSKAMLLVYPPQGTRVVH.TANLIYVDWNNK  | 139 | 339 | HIKTYTRYNG                                   | .....QNL             | AVSVRS.....FSFPLNR           | 385 |
| C. subellipsoidea C-169      | 103 | HHSKAMFLVQFDRGTRVVH.TANLIHQDCNCK  | 133 | 343 | HIKSYLRHSG                                   | .....QRL             | AWIVLTSHNLSKAAWGALQKNN       | 377 |
| T. socialis                  | 291 | HHSKAMFLVYPSGRLVVIH.TSNAIFADCNCK  | 321 | 548 | HIKSYTRYRG                                   | .....QQL             | AWLLVASHNLSKAAWGALQKNG       | 582 |
| C. sorokiniana               | 163 | HHSKAMFLIYEQHGLRVVIF.SANAIPDCNCK  | 193 | 392 | HMKSYLRYRG                                   | .....DEV             | AWQYVGSHNLSKAAWGALQKNA       | 426 |
| M. conductrix                | 239 | HHSKAMFLIYQHGGLRVVIF.TANAIPDCNCK  | 269 | 473 | HVKTYLRYRVVQPAAGAAGAAGAAAAGGDAGGAAAGAAGPAVEV | .....QNL             | AWMYVGSHNLSKAAWGALQKNG       | 539 |
| consensus                    |     | HHSKAMLLVYp.GvRvIVH.TANLIYvDWNnK  |     |     | HIKtftRyng                                   | .....Q.1             | AWfllTSaNLsKAAWGaLQKnn       |     |

Charge

## Conservation

Hydrophob.

Weight

Fungi  
Animals  
Superasterids  
Rosids  
Ancestral Plants

Gymnosperms  
Monocots  
Basal Eudicots  
Algae

- 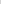 non-conserved
-  similar
- 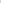  $\geq 50\%$  conserved
- 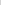  $> 90\%$  conserved
