# Supplementary material for: Plant TDP1 (Tyrosyl-DNA Phosphodiesterase 1): A Phylogenetic Perspective and Gene Expression Data Mining
Source: Genes (Basel). 2020 Dec 7;11(12):1465. doi: 10.3390/genes11121465 (PMC7762302; doi:10.3390/genes11121465)

## HKD motif I

Logo

*S. moellendorffii*  
*S. italica*  
*P. hallii*  
*Z. mays*  
*S. bicolor*  
*B. distachyon*  
*O. sativa Japonica Group*  
*A. trichopoda*  
*B. rapa*  
*C. rubella*  
*A. thaliana*  
*A. lyrata subsp. lyrata*  
*E. grandis*  
*M. truncatula*  
*T. subterraneum*  
*T. pratense*  
*M. pruriens*  
*G. max*  
*P. andersonii*  
*T. orientale*  
*M. domestica*  
*P. persica*  
*R. chinensis*  
*F. vesca subsp. vesca*  
*C. sinensis*  
*C. follicularis*  
*T. cacao*  
*G. arboreum*  
*G. raimondii*  
*P. trichocarpa*  
*R. communis*  
*M. esculenta*  
*S. tuberosum*  
*S. lycopersicum*  
*A. chinensis var. chinensis*  
*V. vinifera*  
 consensus

Charge

Conservation

Hydrophob.

Weight

Ancestral Plants  
 Monocots  
 Rosids  
 Asterids

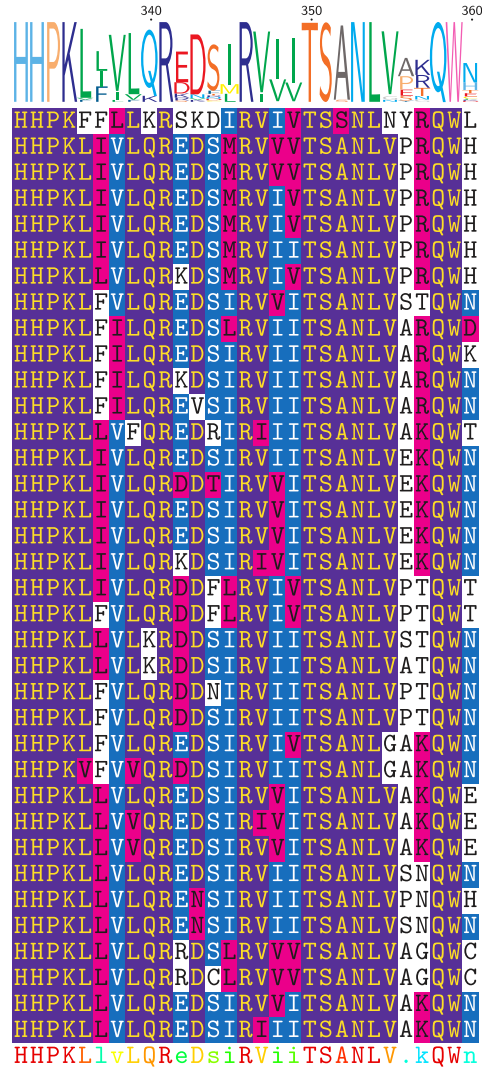

[X] non-conserved  
 [X] similar  
 [X] ≥ 50% conserved  
 [X] ≥ 90% conserved

## HKD motif II

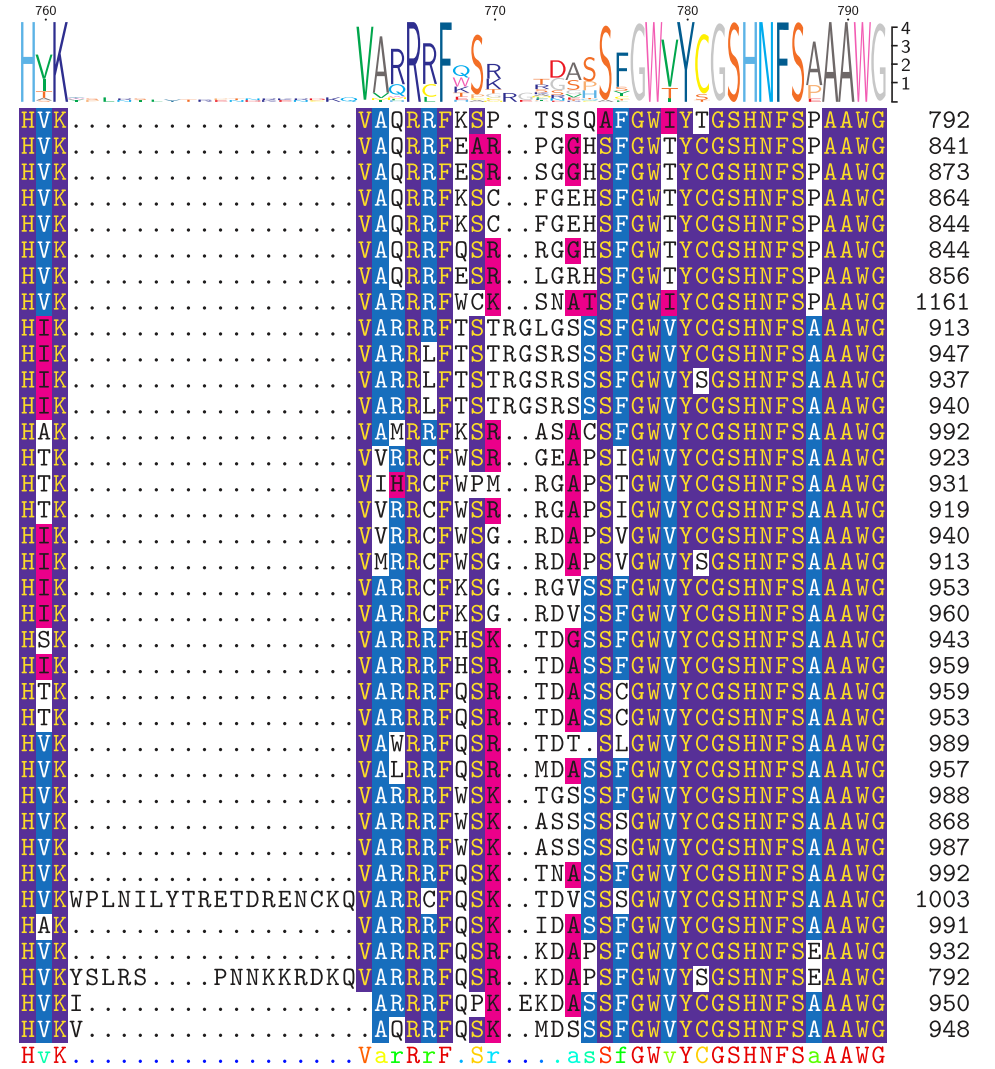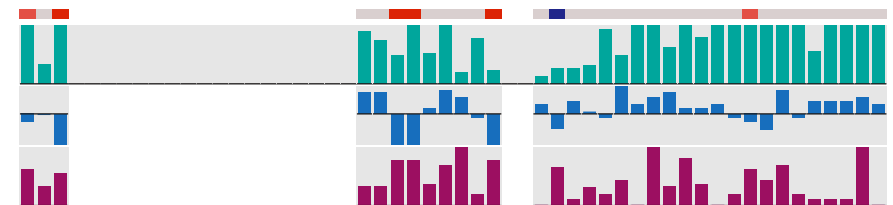

Supplement: Supplementary file 1 [file genes-11-01465-s001.zip › Figure_S2.pdf]
