# Supplementary material for: Plant TDP1 (Tyrosyl-DNA Phosphodiesterase 1): A Phylogenetic Perspective and Gene Expression Data Mining
Source: Genes (Basel). 2020 Dec 7;11(12):1465. doi: 10.3390/genes11121465 (PMC7762302; doi:10.3390/genes11121465)

# Densities of gaps and most conserved site in all MSAs

gap: left to right -> more gaps in the MSA, most\_conserved: left to right -> more conservation

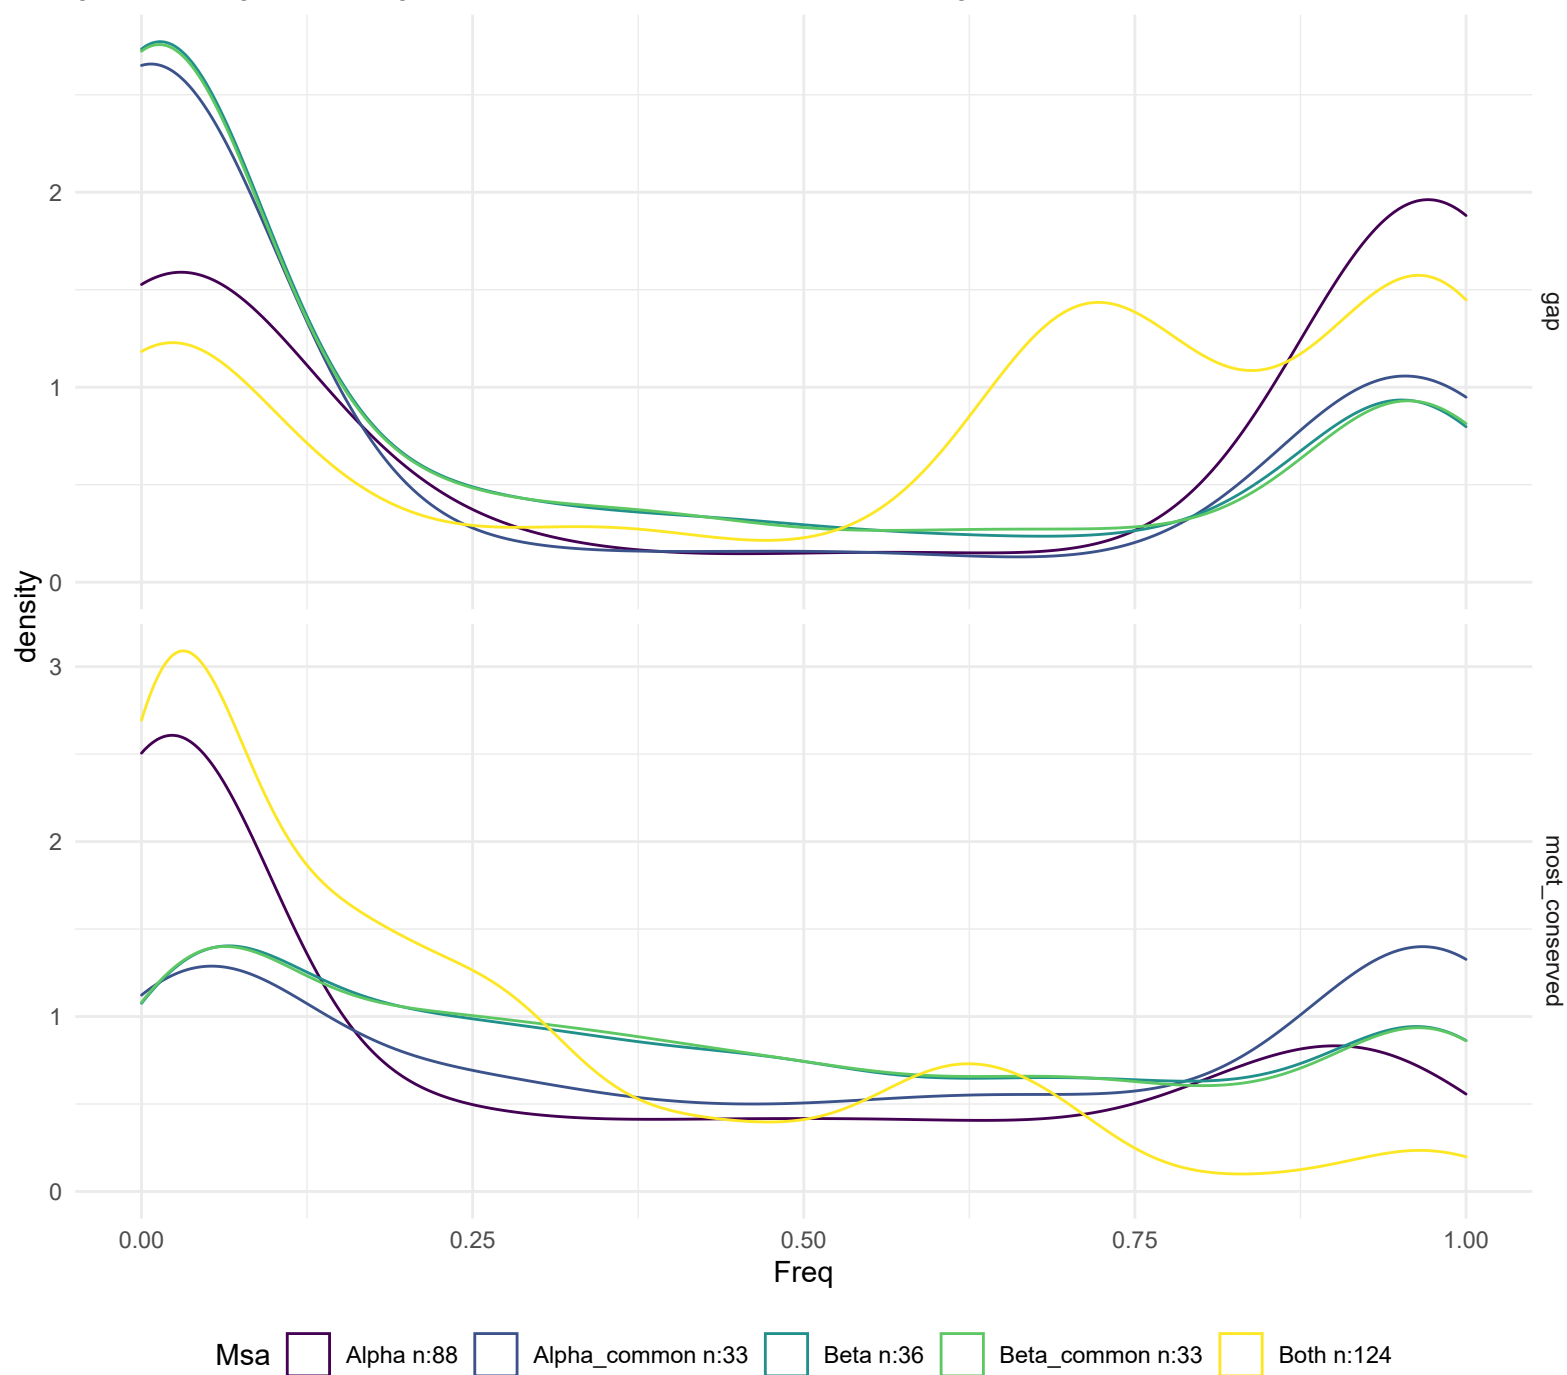

Supplement: Supplementary file 1 [file genes-11-01465-s001.zip › Figure_S3.pdf]
