# Supplementary material for: Plant TDP1 (Tyrosyl-DNA Phosphodiesterase 1): A Phylogenetic Perspective and Gene Expression Data Mining
Source: Genes (Basel). 2020 Dec 7;11(12):1465. doi: 10.3390/genes11121465 (PMC7762302; doi:10.3390/genes11121465)
Supplement: Supplementary file 1 [file genes-11-01465-s001.zip › Figure_S4.pdf]

**(a)**

UPGMA Tree of TDP1alpha

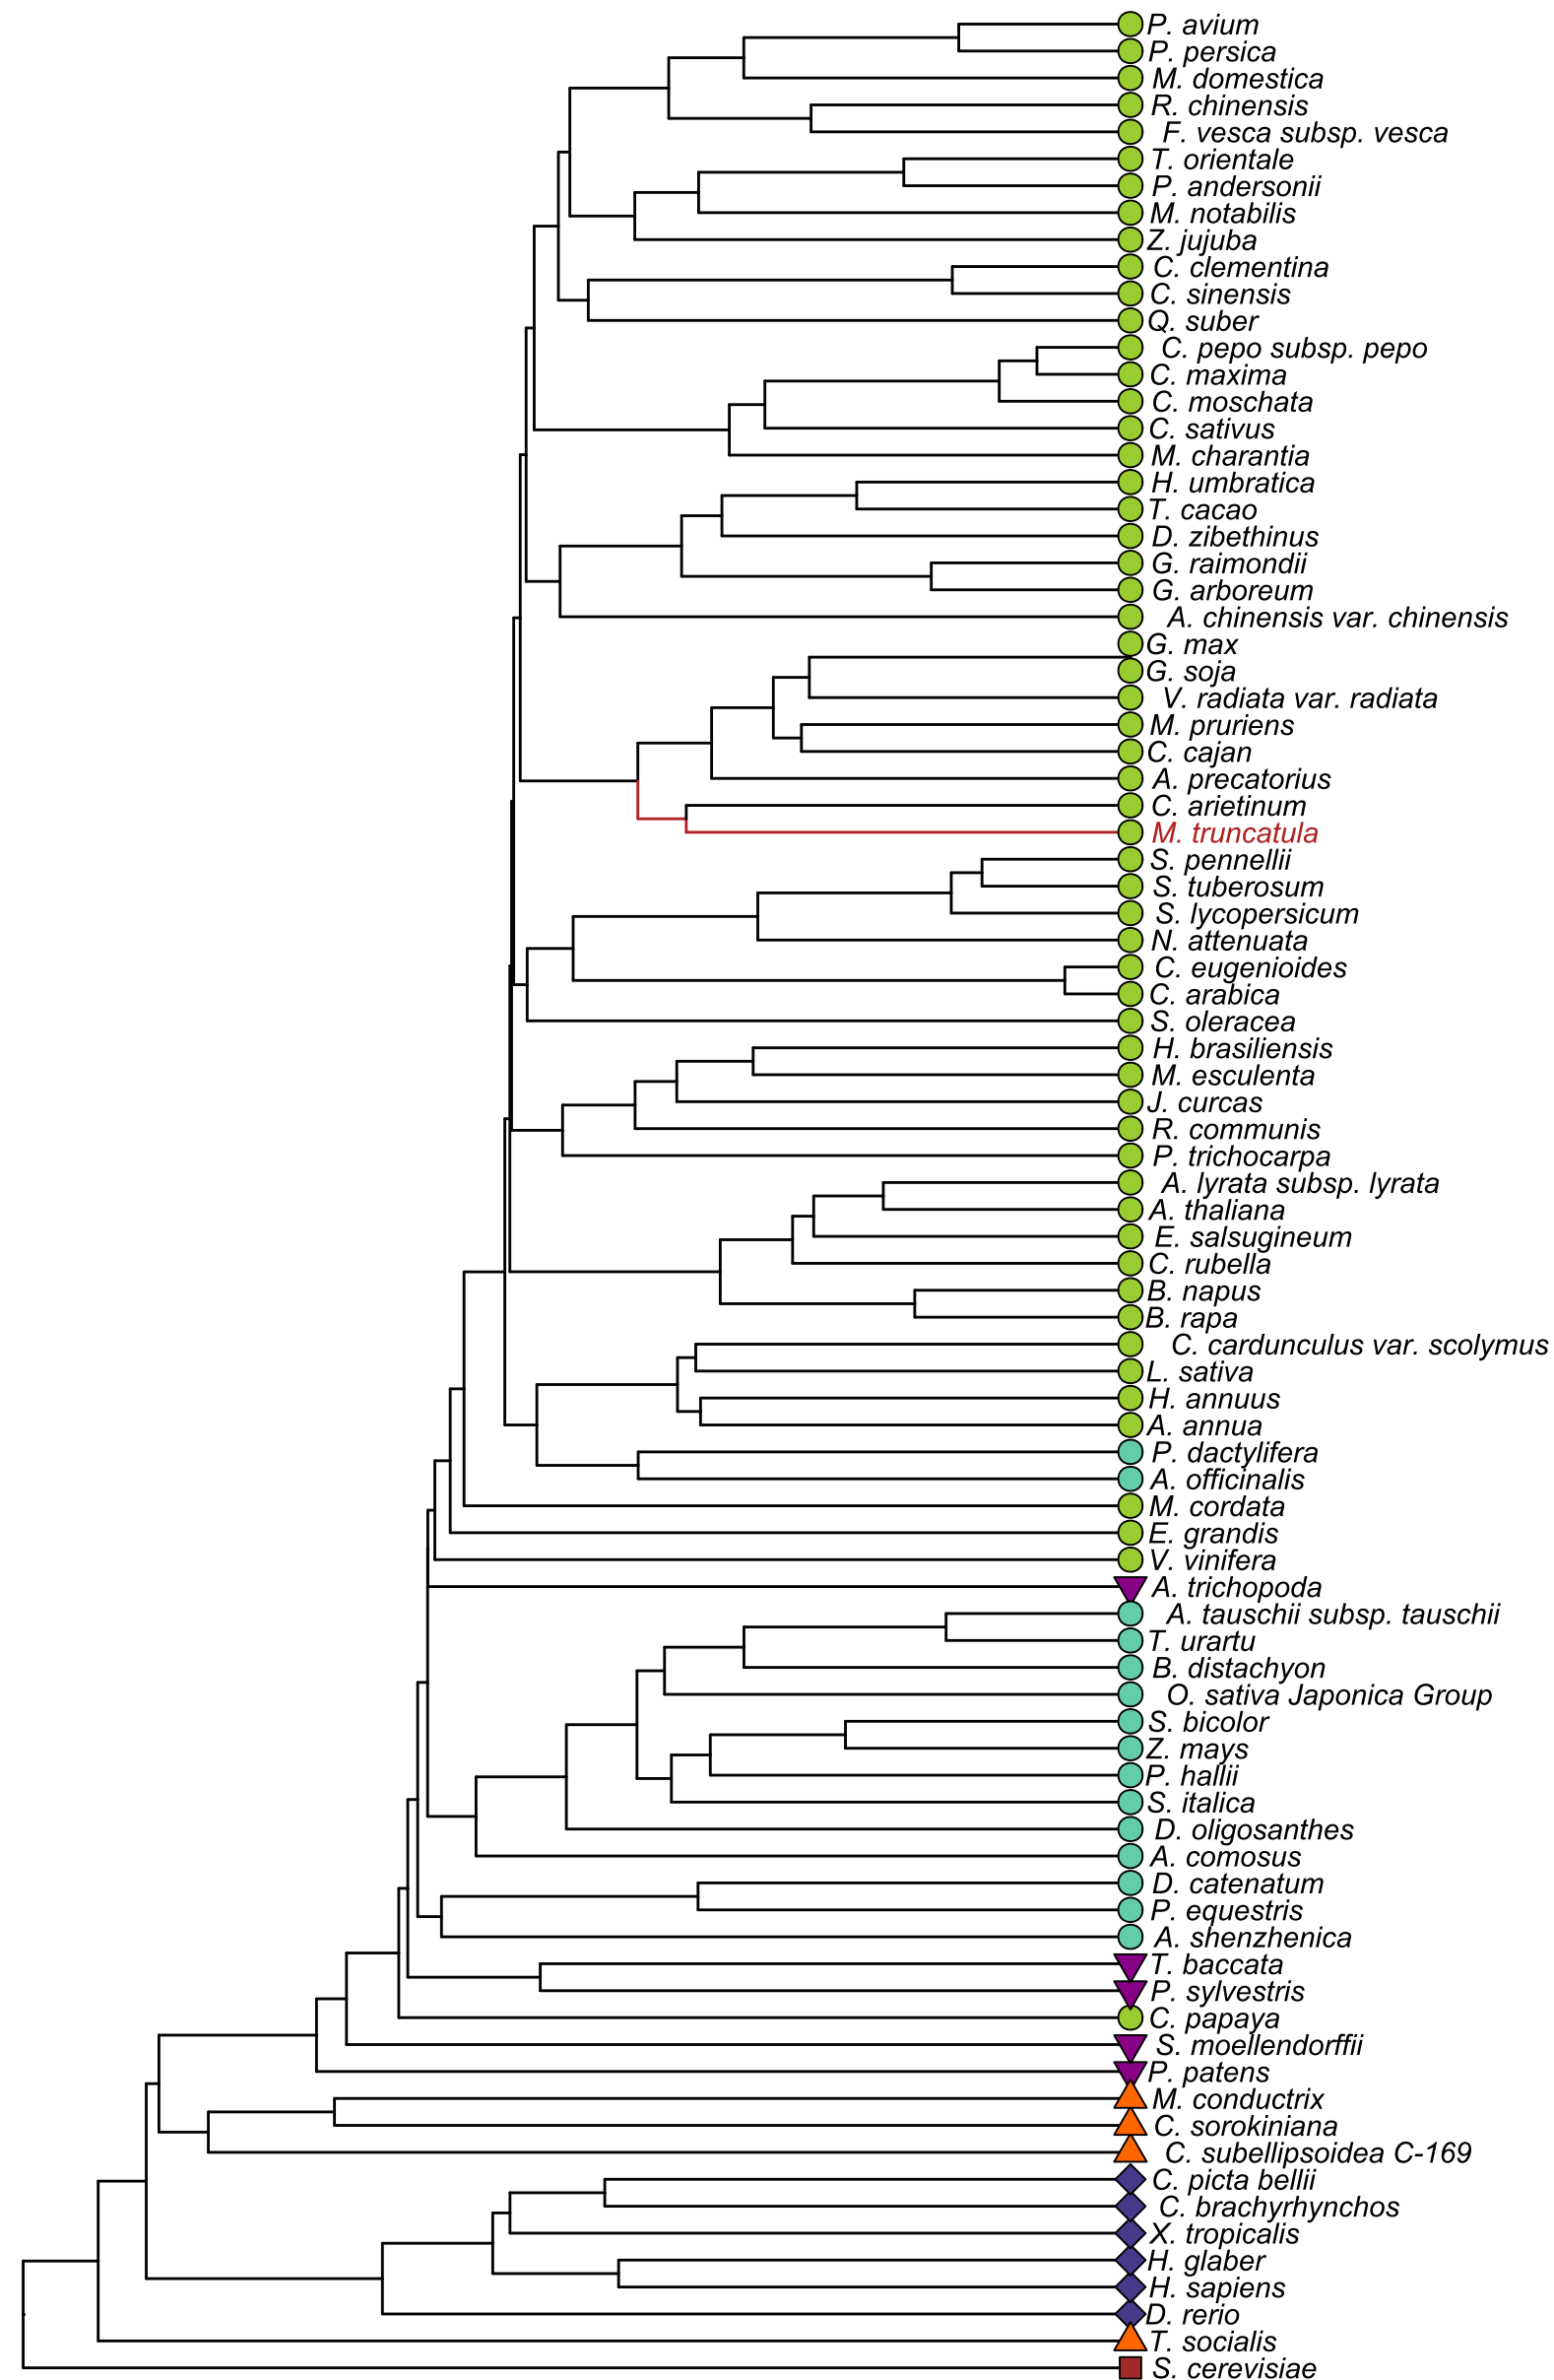**(b)**

NJ Tree of TDP1alpha

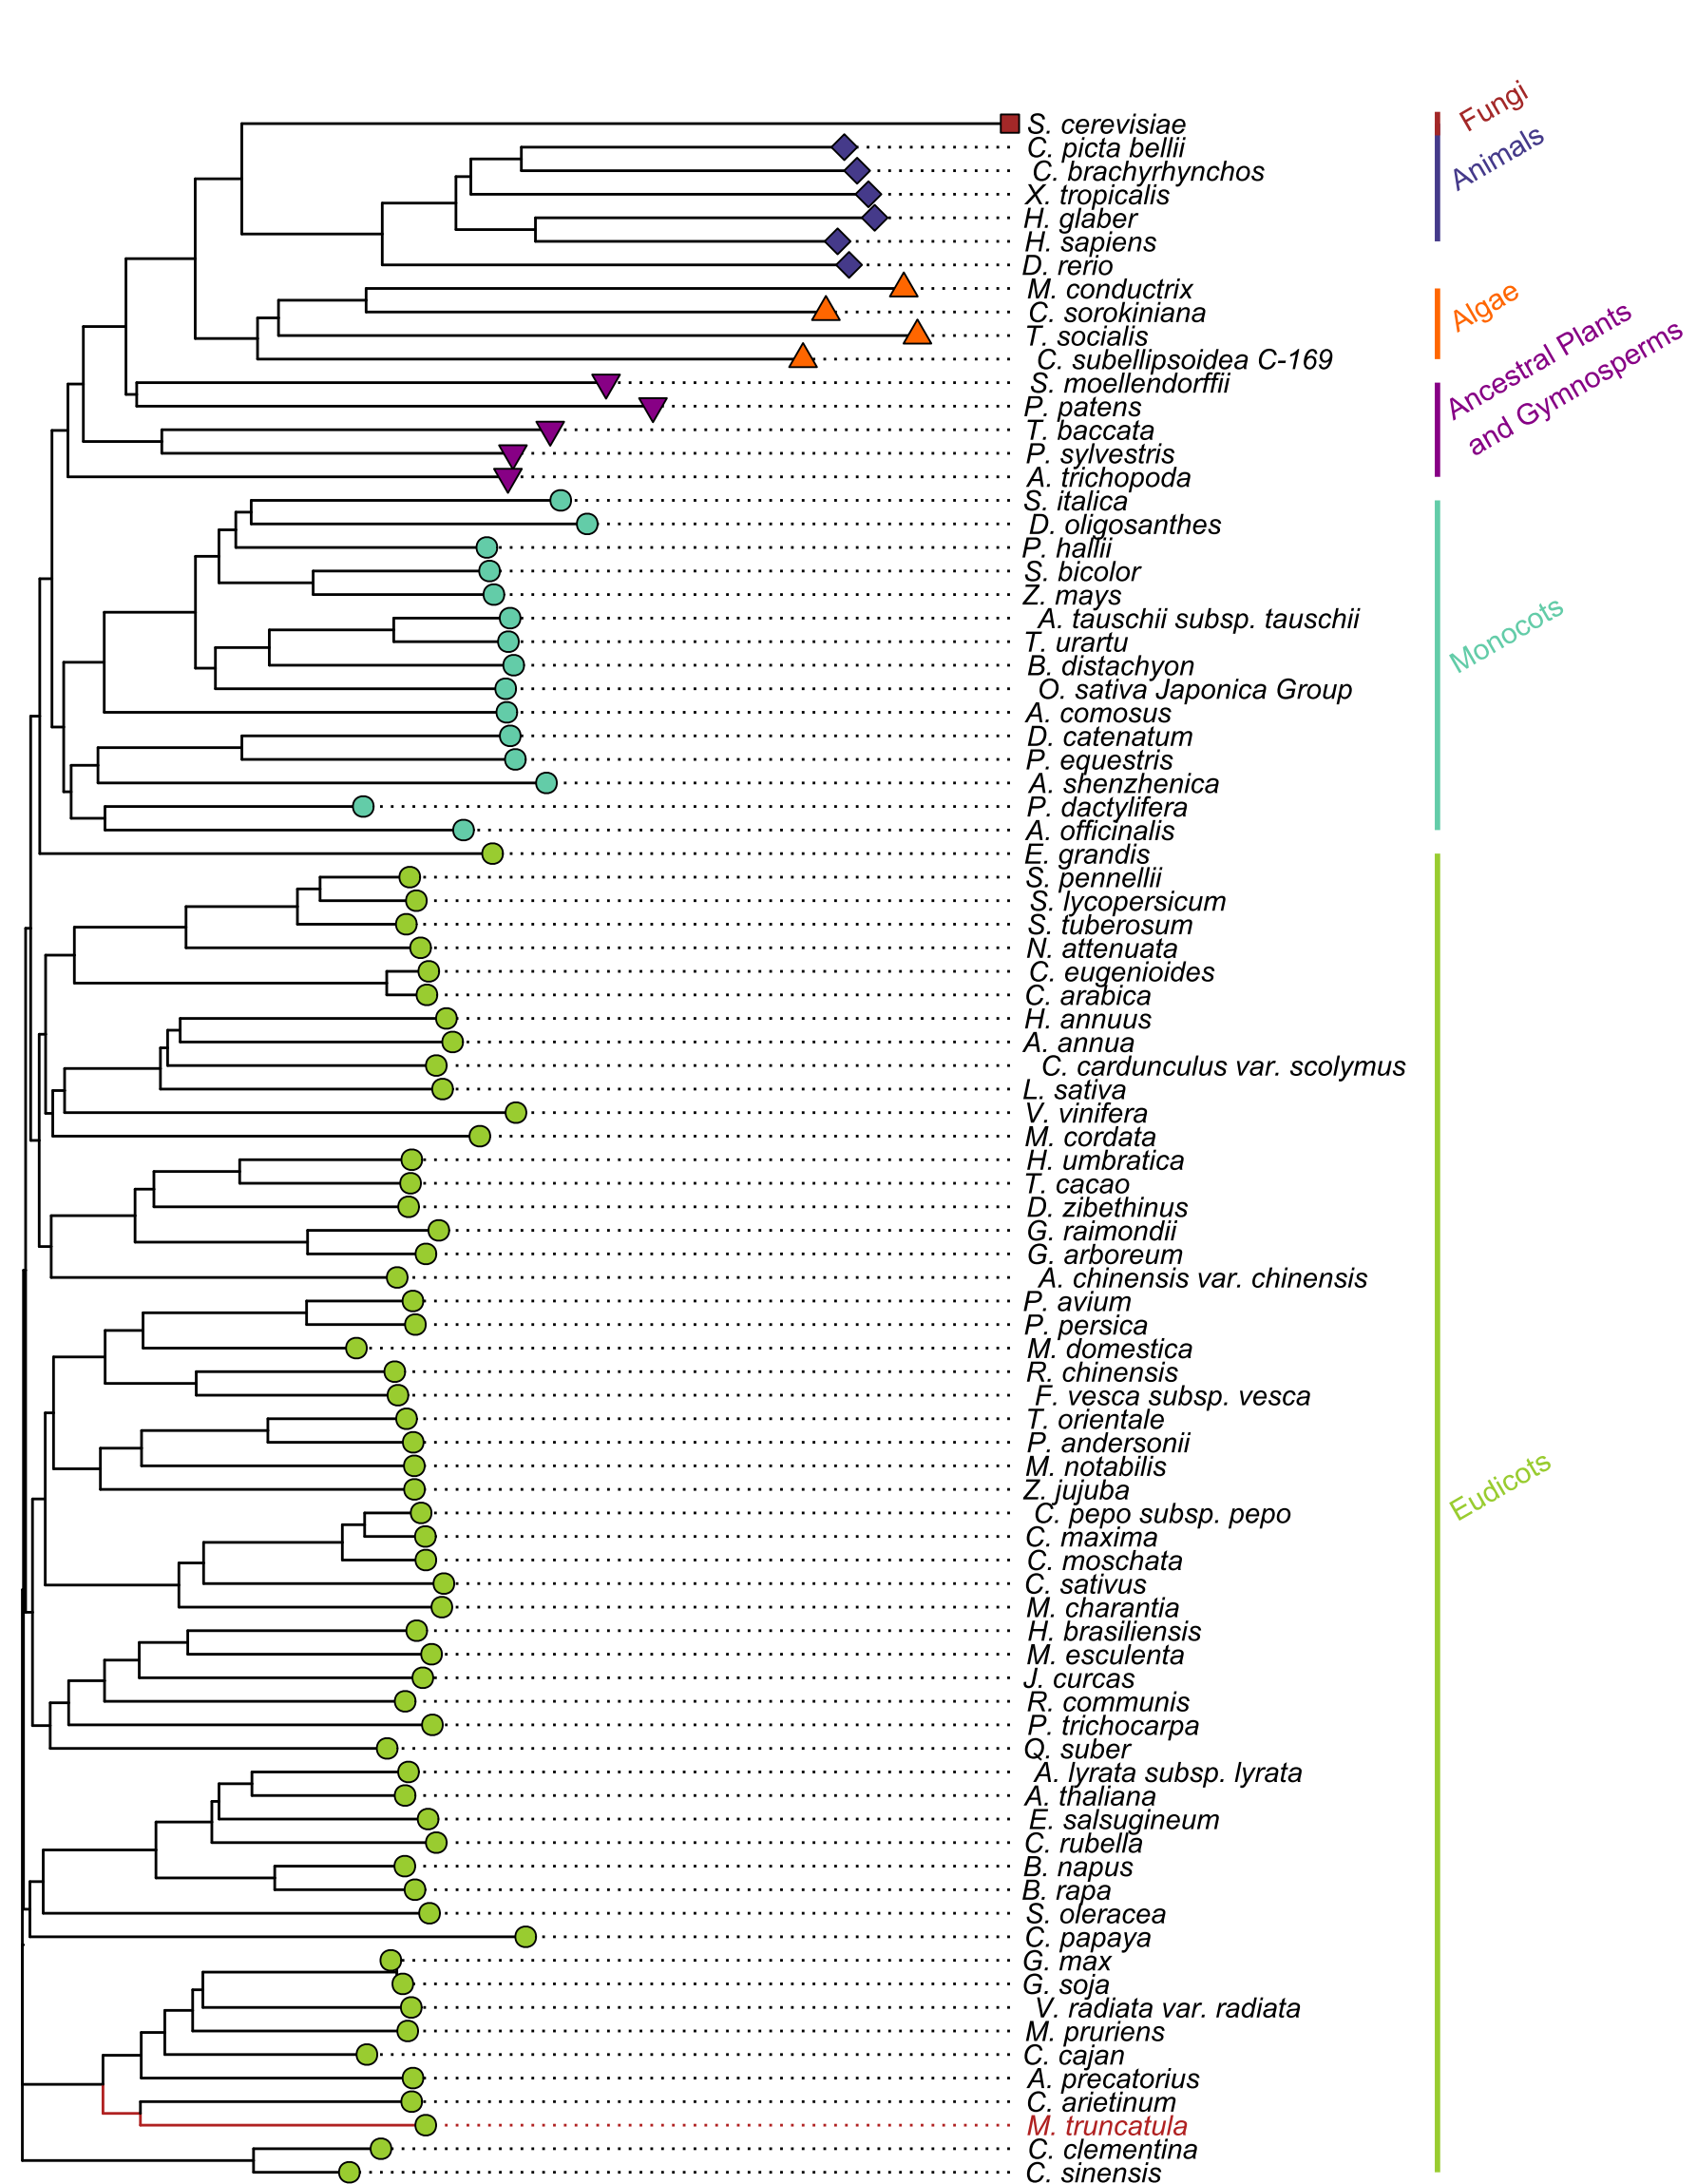Fungi  
Animals

Algae

Ancestral Plants  
and Gymnosperms

Monocots

Eudicots
