# Supplementary material for: Plant TDP1 (Tyrosyl-DNA Phosphodiesterase 1): A Phylogenetic Perspective and Gene Expression Data Mining
Source: Genes (Basel). 2020 Dec 7;11(12):1465. doi: 10.3390/genes11121465 (PMC7762302; doi:10.3390/genes11121465)

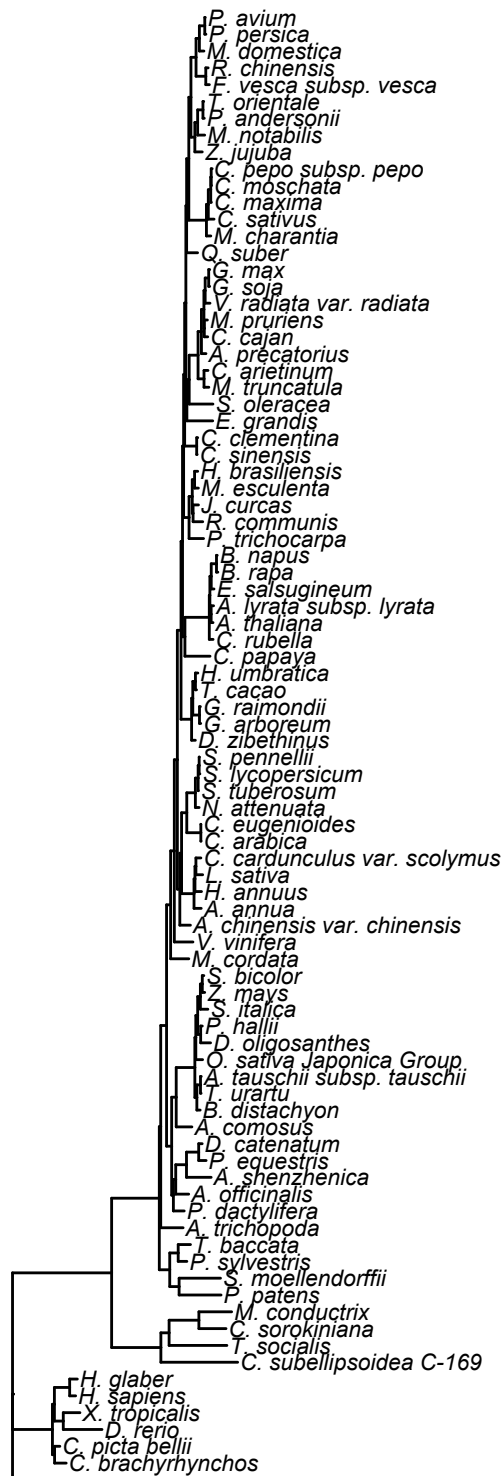

Rosids

Superasterids

Basal Eudicots

Monocots

Gymnosperms

Ancestral Plants

Algae

Animals

Fungi

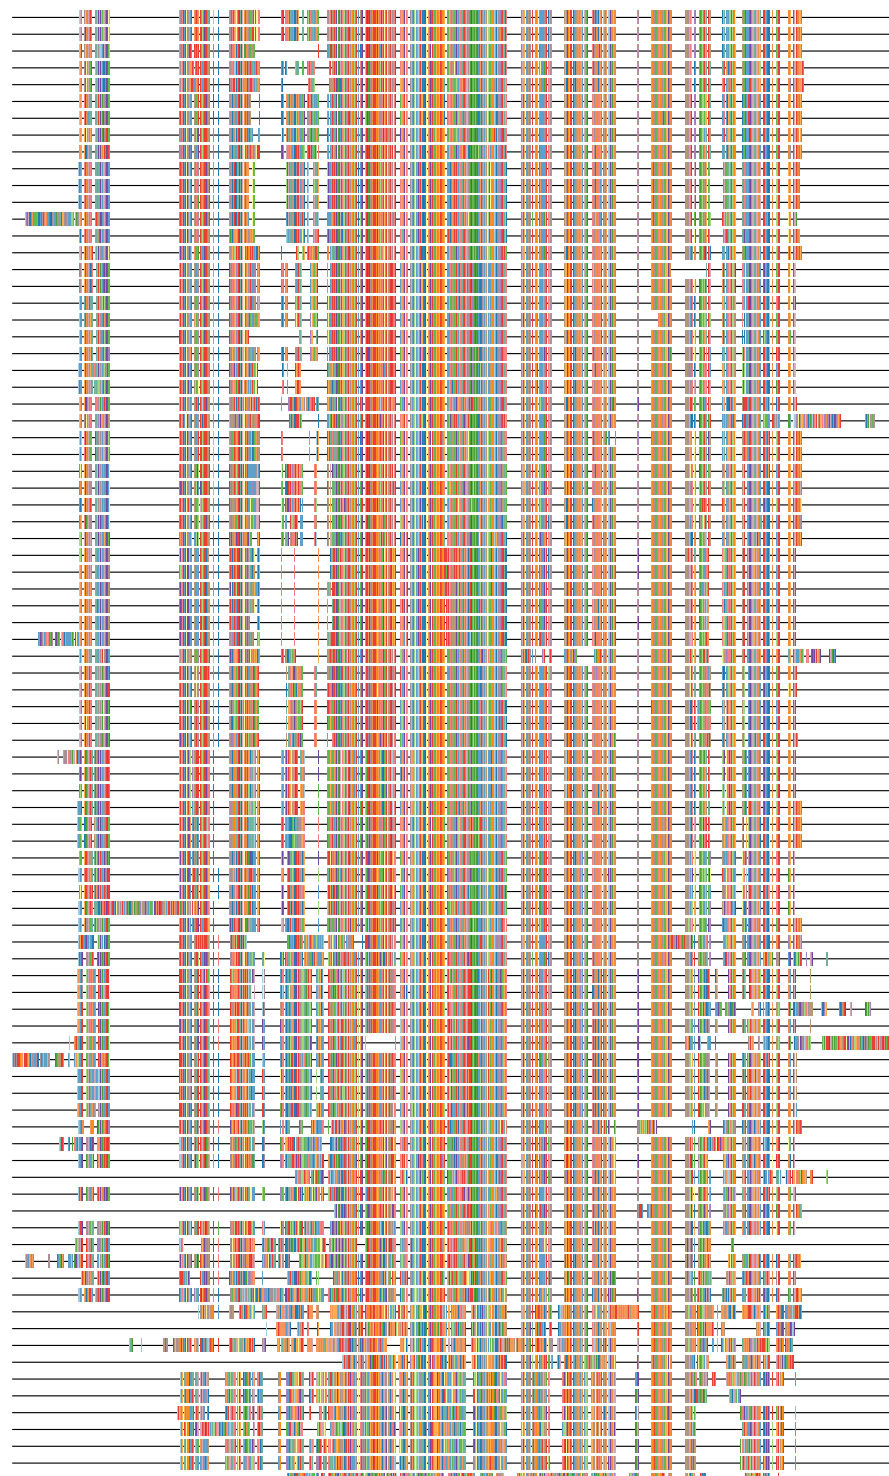

Supplement: Supplementary file 1 [file genes-11-01465-s001.zip › Figure_S6.pdf]
