# Supplementary material for: Plant TDP1 (Tyrosyl-DNA Phosphodiesterase 1): A Phylogenetic Perspective and Gene Expression Data Mining
Source: Genes (Basel). 2020 Dec 7;11(12):1465. doi: 10.3390/genes11121465 (PMC7762302; doi:10.3390/genes11121465)
Supplement: Supplementary file 1 [file genes-11-01465-s001.zip › Tables.pdf]

**Table S1.** Class, species and NCBI accession number of all the TDP1 $\alpha$  sequences present in this study.

| Class    | Species                | NCBI<br>Accession |
|----------|------------------------|-------------------|
| Eudicots | <i>M. truncatula</i>   | XP_003622687      |
| Eudicots | <i>C. arietinum</i>    | XP_012568966      |
| Eudicots | <i>A. precatorius</i>  | XP_027361208      |
| Eudicots | <i>C. cajan</i>        | KYP67403          |
| Eudicots | <i>G. max</i>          | XP_006578130      |
| Eudicots | <i>G. soja</i>         | KHN29597          |
| Eudicots | <i>V. radiata</i>      | XP_014520570      |
| Eudicots | <i>M. pruriens</i>     | RDX62056          |
| Eudicots | <i>Q. suber</i>        | XP_023920145      |
| Eudicots | <i>C. clementina</i>   | XP_024046807      |
| Eudicots | <i>C. sinensis</i>     | XP_006467985      |
| Eudicots | <i>M. esculenta</i>    | XP_021599995      |
| Eudicots | <i>T. orientale</i>    | PON85342          |
| Eudicots | <i>J. curcas</i>       | XP_012091409      |
| Eudicots | <i>H. brasiliensis</i> | XP_021642094      |
| Eudicots | <i>M. notabilis</i>    | EXB31386          |
| Eudicots | <i>V. vinifera</i>     | RVW45926          |
| Eudicots | <i>P. andersonii</i>   | PON39438          |
| Eudicots | <i>P. avium</i>        | XP_021821508      |
| Eudicots | <i>S. oleracea</i>     | XP_021836412      |
| Eudicots | <i>G. arboreum</i>     | KHG26217          |
| Eudicots | <i>P. persica</i>      | XP_020416746      |
| Eudicots | <i>R. communis</i>     | XP_015574204      |
| Eudicots | <i>C. eugenioides</i>  | XP_027163996      |
| Eudicots | <i>R. chinensis</i>    | XP_024159806      |
| Eudicots | <i>C. arabica</i>      | XP_027105045      |
| Eudicots | <i>Z. jujuba</i>       | XP_015883785      |
| Eudicots | <i>A. chinensis</i>    | PSS04715          |
| Eudicots | <i>H. umbratica</i>    | XP_021294271      |
| Eudicots | <i>C. pepo</i>         | XP_023544483      |
| Eudicots | <i>C. moschata</i>     | XP_022950185      |
| Eudicots | <i>S. pennellii</i>    | XP_015067766      |
| Eudicots | <i>C. maxima</i>       | XP_022978030      |
| Eudicots | <i>N. attenuata</i>    | OIT34941          |
| Eudicots | <i>C. cardunculus</i>  | XP_024983894      |
| Eudicots | <i>S. lycopersicum</i> | XP_010317667      |
| Eudicots | <i>D. zibethinus</i>   | XP_022720581      |
| Eudicots | <i>P. trichocarpa</i>  | XP_006383945      |
| Eudicots | <i>M. charantia</i>    | XP_022142241      |
| Eudicots | <i>H. annuus</i>       | XP_022015799      |
| Eudicots | <i>L. sativa</i>       | XP_023743532      |
| Eudicots | <i>A. lyrata</i>       | XP_020879079      |
| Eudicots | <i>B. napus</i>        | XP_013728150      |
| Eudicots | <i>E. salsugineum</i>  | XP_006400034      |

Table S1. Cont.

| Class      | Species                   | NCBI Accession |
|------------|---------------------------|----------------|
| Eudicots   | <i>A. annua</i>           | PWA63244       |
| Eudicots   | <i>M. cordata</i>         | OVA11144       |
| Eudicots   | <i>A. thaliana</i>        | ACO60340       |
| Eudicots   | <i>C. rubella</i>         | XP_006290125   |
| Eudicots   | <i>M. domestica</i>       | XP_008384030   |
| Eudicots   | <i>F. vesca</i>           | XP_011459955   |
| Eudicots   | <i>B. rapa</i>            | XP_009131446   |
| Eudicots   | <i>C. papaya</i>          | XP_021887357   |
| Eudicots   | <i>G. raimondii</i>       | XP_012456873   |
| Eudicots   | <i>T. cacao</i>           | XP_007025983   |
| Eudicots   | <i>E. grandis</i>         | XP_010052433   |
| Eudicots   | <i>S. tuberosum</i>       | XP_006343414   |
| Eudicots   | <i>C. sativus</i>         | XP_011658164   |
| Lycophita  | <i>S. moellendorffii</i>  | XP_002970738   |
| Bryophyta  | <i>P. patens</i>          | XP_024385825   |
| Ancestral  | <i>A. trichopoda</i>      | XP_020517687   |
| Monocots   | <i>A. comosus</i>         | OAY67291       |
| Monocots   | <i>P. hallii</i>          | XP_025800030   |
| Monocots   | <i>S. italica</i>         | XP_022683988   |
| Monocots   | <i>A. officinalis</i>     | XP_020256587   |
| Monocots   | <i>T. urartu</i>          | EMS46186       |
| Monocots   | <i>S. bicolor</i>         | XP_021309892   |
| Monocots   | <i>D. catenatum</i>       | XP_020688319   |
| Monocots   | <i>Z. mays</i>            | XP_008651694   |
| Monocots   | <i>A. tauschii</i>        | XP_020162379   |
| Monocots   | <i>B. distachyon</i>      | XP_024313659   |
| Monocots   | <i>P. equestris</i>       | XP_020589644   |
| Monocots   | <i>O. sativa</i>          | XP_015646620   |
| Monocots   | <i>P. dactylifera</i>     | XP_026664181   |
| Monocots   | <i>A. shenzhenica</i>     | PKA57825       |
| Monocots   | <i>D. oligosanthos</i>    | OEL28790       |
| Gymnosperm | <i>P. sylvestris</i>      | PSY00009297    |
| Gymnosperm | <i>T. baccata</i>         | TBA00005746    |
| Algae      | <i>C. sorokiniana</i>     | PRW59620       |
| Algae      | <i>M. conductrix</i>      | PSC74986       |
| Algae      | <i>C. subellipsoidea</i>  | EIE25781       |
| Algae      | <i>T. socialis</i>        | PNH10367       |
| Fungi      | <i>S. cerevisiae</i>      | KZV13308       |
| Animals    | <i>H. glaber</i>          | EHB09657       |
| Animals    | <i>H. sapiens</i>         | AAI07878       |
| Animals    | <i>C. picta bellii</i>    | XP_008163939   |
| Animals    | <i>D. rerio</i>           | XP_700174      |
| Animals    | <i>X. tropicalis</i>      | CAJ81457       |
| Animals    | <i>C. brachyrrhynchos</i> | KFO56089       |

**Table S2.** Class, species and NCBI accession number of all the TDP1 $\beta$  sequences present in this study.

| <b>Class</b> | <b>Species</b>           | <b>NCBI Accession</b> |
|--------------|--------------------------|-----------------------|
| Eudicots     | <i>M. truncatula</i>     | AET04910              |
| Eudicots     | <i>T. pratense</i>       | PNY07045              |
| Eudicots     | <i>M. pruriens</i>       | RDX75863              |
| Eudicots     | <i>T. orientale</i>      | PON97503              |
| Eudicots     | <i>P. andersonii</i>     | PON71257              |
| Eudicots     | <i>A. chinensis</i>      | PSR89388              |
| Eudicots     | <i>G. arboreum</i>       | KHG24729              |
| Eudicots     | <i>R. chinensis</i>      | PRQ16808              |
| Eudicots     | <i>C. follicularis</i>   | GAV73409              |
| Eudicots     | <i>R. communis</i>       | EEF51660              |
| Eudicots     | <i>T. subterraneum</i>   | GAU25446              |
| Eudicots     | <i>M. esculenta</i>      | XP_021614780          |
| Eudicots     | <i>P. trichocarpa</i>    | XP_024438691          |
| Eudicots     | <i>G. max</i>            | XP_006584680          |
| Eudicots     | <i>P. persica</i>        | XP_020418919          |
| Eudicots     | <i>M. domestica</i>      | XP_008356812          |
| Eudicots     | <i>F. vesca</i>          | XP_011470841          |
| Eudicots     | <i>A. thaliana</i>       | OAO91221              |
| Eudicots     | <i>A. lyrata</i>         | XP_020876114          |
| Eudicots     | <i>C. rubella</i>        | XP_023637563          |
| Eudicots     | <i>B. rapa</i>           | XP_009125687          |
| Eudicots     | <i>G. raimondii</i>      | XP_012467165          |
| Eudicots     | <i>T. cacao</i>          | XP_007038197          |
| Eudicots     | <i>C. sinensis</i>       | XP_006485048          |
| Eudicots     | <i>E. grandis</i>        | XP_010065187          |
| Eudicots     | <i>V. vinifera</i>       | XP_010644043          |
| Eudicots     | <i>S. tuberosum</i>      | XP_006341694          |
| Eudicots     | <i>S. lycopersicum</i>   | XP_025885954          |
| Monocots     | <i>S. bicolor</i>        | XP_002446388          |
| Monocots     | <i>Z. mays</i>           | ONM62577              |
| Monocots     | <i>S. italica</i>        | RCV33451              |
| Monocots     | <i>P. halli</i>          | XP_025826012          |
| Monocots     | <i>O. sativa</i>         | XP_015635430          |
| Monocots     | <i>B. distachyon</i>     | XP_010239843          |
| Lycophita    | <i>S. moellendorffii</i> | XP_002993511          |
| Ancestral    | <i>A. trichopoda</i>     | XP_011623559          |

**Table S3.** Accession numbers for *TDP1 $\alpha$*  and *TDP1 $\beta$*  genes retrieved from Phytozome v12.1 (<https://phytozome.jgi.doe.gov/>) and used to acquire the gene expression data from BAR Toronto eFP browser (<http://bar.utoronto.ca/eplant>).

| <b>Species</b>                    | <b><i>TDP1<math>\alpha</math></i></b> | <b><i>TDP1<math>\beta</math></i></b> |
|-----------------------------------|---------------------------------------|--------------------------------------|
| <i>Selaginella moellendorffii</i> | Smo170833                             | Smo415650                            |
| <i>Zea mays</i>                   | GRMZM2G080174                         | GRMZM2G069856                        |
| <i>Oryza sativa</i>               | LOC_Os07g34598                        | LOC_Os04g33050                       |
| <i>Medicago truncatula</i>        | Medtr7g050860                         | Medtr8g095490                        |
| <i>Glycine max</i>                | Glyma.04G064300                       | Glyma.08G005800                      |
| <i>Solanum lycopersicum</i>       | Solyc03g031820.2                      | Solyc03g117960.2                     |
| <i>Solanum tuberosum</i>          | PGSC0003DMG400024073                  | PGSC0003DMG400014226                 |

**Table S4.** Logo sequence, E-value, number of sites and width for each motif found by MEME5.0 in TDP1 $\alpha$  sequences.

| Motifs TDP1 alpha |                                                                                    | E-value   | Sites | Width |
|-------------------|------------------------------------------------------------------------------------|-----------|-------|-------|
| 1.                | 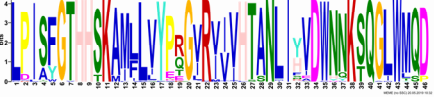  | 3.8e-3023 | 69    | 46    |
| 2.                | 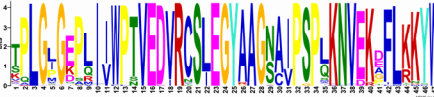  | 4.7e-2742 | 61    | 50    |
| 3.                | 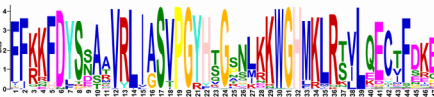  | 6.3e-2726 | 69    | 50    |
| 4.                | 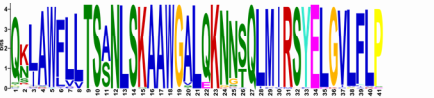  | 6.8e-2648 | 69    | 41    |
| 5.                | 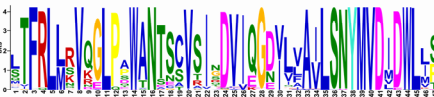  | 1.1e-2634 | 62    | 50    |
| 6.                | 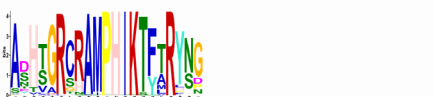 | 8.0e-1196 | 68    | 21    |

**Table S5.** Logo sequence, E-value, number of sites and width for each motif found by MEME5.0 in TDP1 $\beta$  sequences.

| Motifs TDP1 beta |                                                                                     | E-value   | Sites | Width |
|------------------|-------------------------------------------------------------------------------------|-----------|-------|-------|
| 1.               | 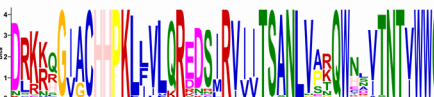 | 1.1e-1062 | 26    | 50    |
| 2.               | 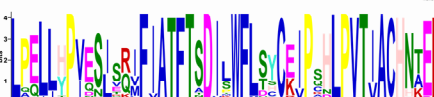 | 1.4e-981  | 26    | 50    |
| 3.               | 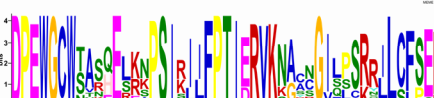 | 6.1e-917  | 26    | 50    |
| 4.               | 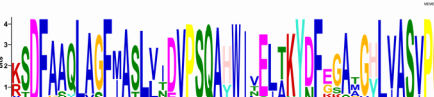 | 1.0e-874  | 26    | 50    |
| 5.               | 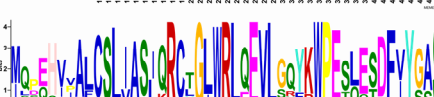 | 9.4e-849  | 26    | 50    |
| 6.               | 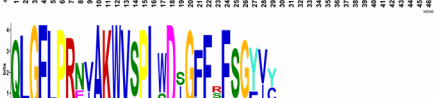 | 2.0e-516  | 26    | 29    |
| 7.               | 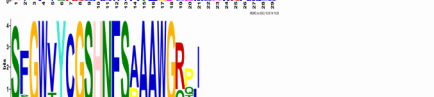 | 1.7e-436  | 26    | 21    |
